# Supplementary material for: グローバルセンス 海外工場を切り盛りする技術者のための経営入門(第3回)整理・整頓は健全経営の第一歩 海外だからこそ5Sが効く
Source: JCI journal article supplement (doi:10.1172/jci.insight.133811), 2012-07-01
Supplement: sd1 [file 1]

## Supplementary Methods

### The essential formulas and R codes in data processing

In our study, not only the microarray data, but also the RNA-seq data were normalized to 0-1. As we all know, there is batch effect between gene expression data from different databases. Before putting the data of different databases together for analysis, batch effect should be corrected first. In our study, RNA-seq data and microarray data were put together for analysis, so an appropriate normalization method was necessary. Given that the technological principles and data processing methods of RNA-seq and microarray are different, there is no widely recognized transformation relationship between RNA-seq data and microarray data at present.

We made some attempts. Since each dataset we included had a sufficient sample size, we take each dataset as a whole. We standardized every DEIR in its own cohort, and normalized the gene expression value to lie between 0 and 1. We made some attempts on the normalization methods and found that the division-based normalization method was suitable for RNA-seq data while the subtraction-based normalization method was suitable for microarray data. Compared with other normalization methods we tried, this method significantly improved the ability of prognostic stratification and the accuracy of prediction.

#### 1. RNA-Seq data

(1) FPKM value was converted to TPM value using the R codes as follows:

```
FPKMtoTPM <- function(FPKM) {exp(log(FPKM) - log(sum(FPKM)) + log(1e6))}
```

(2) Gene expression data (TPM value) was normalized to [0,1] using the formula and

R codes as follows:

Formula:  $X' = \log_2(X+1) / \log_2(X_{\max}+1)$       X: the TPM value of the DEIR.

R codes: `normalization1 <- function(x){log2(x+1)/log2(max(x)+1)}`

## 2. Microarray data

Gene expression data in microarray datasets was normalized to [0,1] using the formula

and R codes as follows:

Formula:  $X' = (X - X_{\min}) / (X_{\max} - X_{\min})$       X: the processed microarray value of the

DEIR. The microarray data were also log-transformed (on a base 2 scale) when processed in GeneSpring GX software.

R codes: `normalization2 <- function(x){(x-min(x))/(max(x)-min(x))}`

**Figure S1.** Kaplan-Meier curve of OS based on immune infiltration type in TCGA dataset. Patients with type A infiltration had better OS than those with type B infiltration.

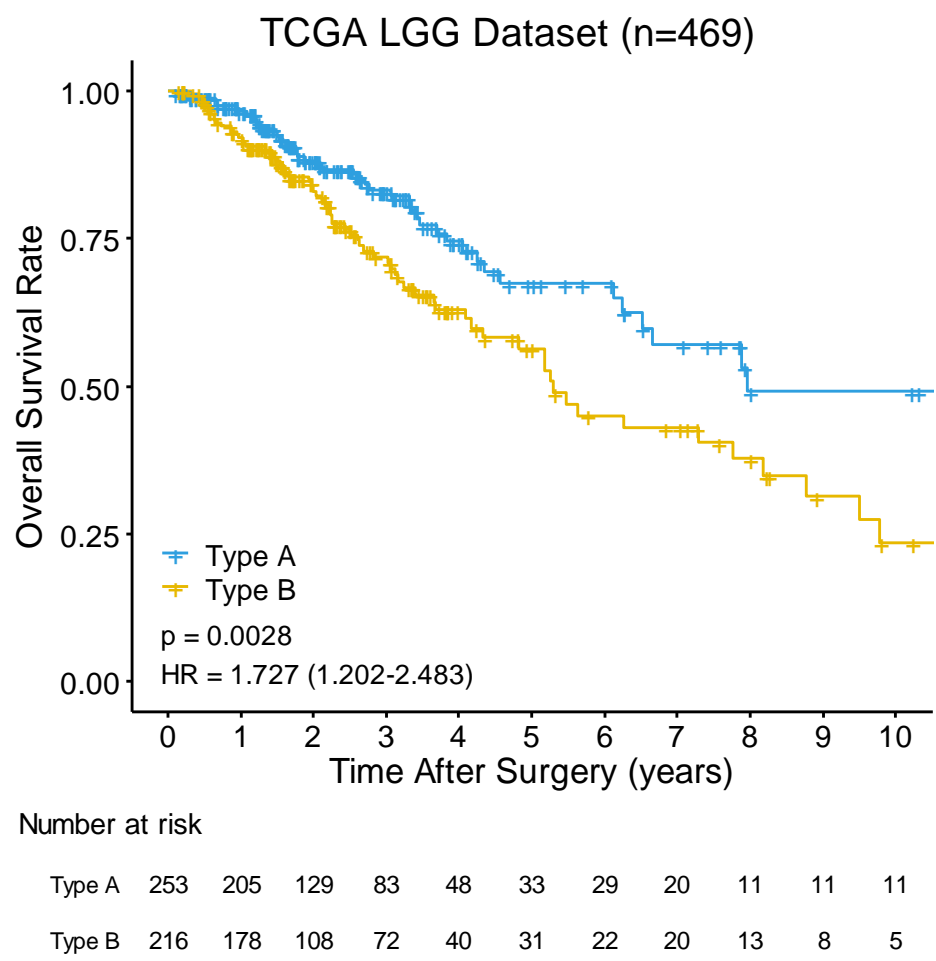



**Figure S3.** The formula of the risk score model.

Risk Score =  $(2.1627 \times \text{relative expression of IGFBP5}) + (1.8334 \times \text{relative expression of CENPF}) + (1.4131 \times \text{relative expression of CD101}) + (1.3129 \times \text{relative expression of SIGLEC1}) + (1.3071 \times \text{relative expression of TMPRSS3}) + (0.8839 \times \text{relative expression of SIGLEC8}) + (0.8605 \times \text{relative expression of BIRC5}) + (0.8552 \times \text{relative expression of EMP1}) + (0.4835 \times \text{relative expression of SPP1}) + (0.4357 \times \text{relative expression of PDCD1LG2}) + (0.3861 \times \text{relative expression of FABP5}) + (0.2623 \times \text{relative expression of CD37}) + (0.2018 \times \text{relative expression of CD300LF}) + (0.0448 \times \text{relative expression of ADAMTS3}) + (-0.0003 \times \text{relative expression of PROK2}) + (-0.3417 \times \text{relative expression of CBX6}) + (-0.9706 \times \text{relative expression of GPR27}) + (-1.2091 \times \text{relative expression of CRYBB1}) + (-1.5871 \times \text{relative expression of ANKRD22}) + (-3.3937 \times \text{relative expression of HEY1})$

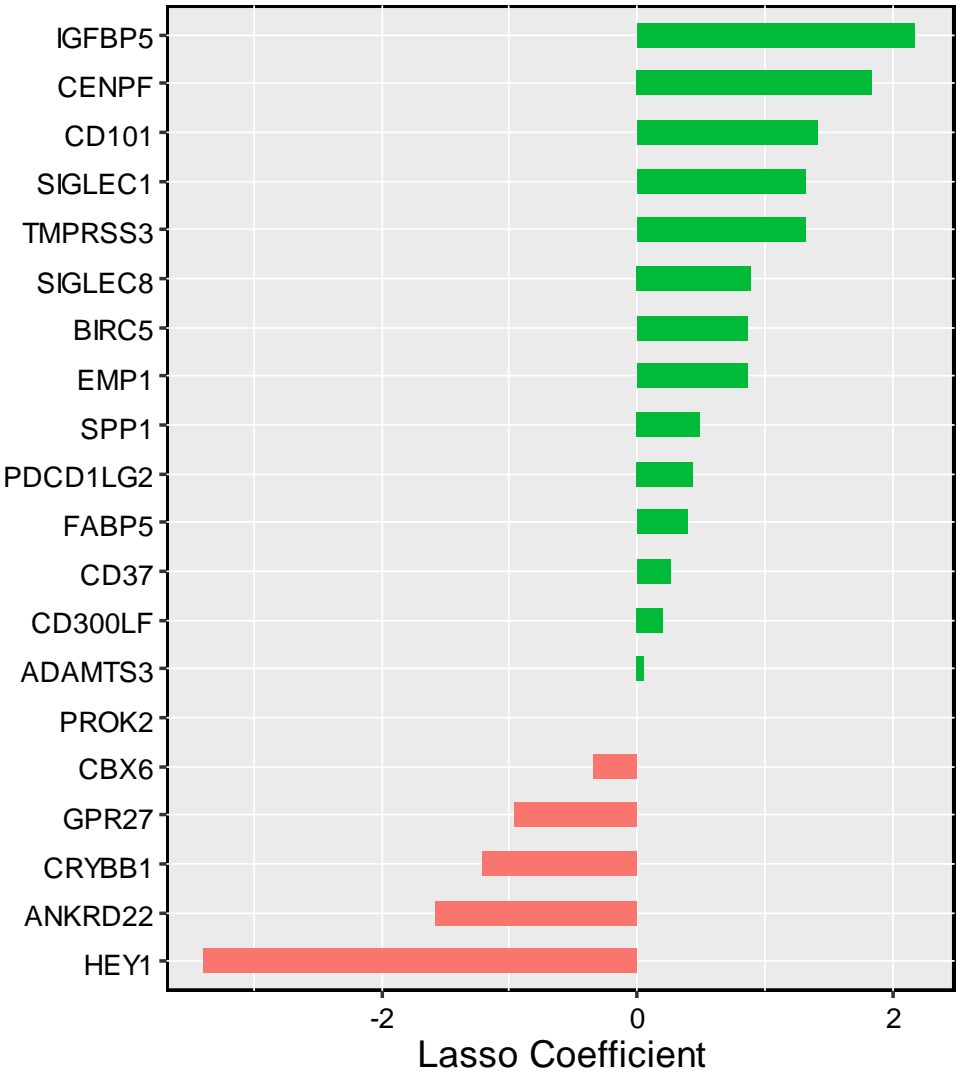

**Figure S4.** Overrepresented biological processes identified by the 120 survival-related immune metagenes. Most of the biological processes are related to the activation and proliferation of immune cells, indicating that intratumoral immune infiltration plays an important role in the prognosis of LGGs.

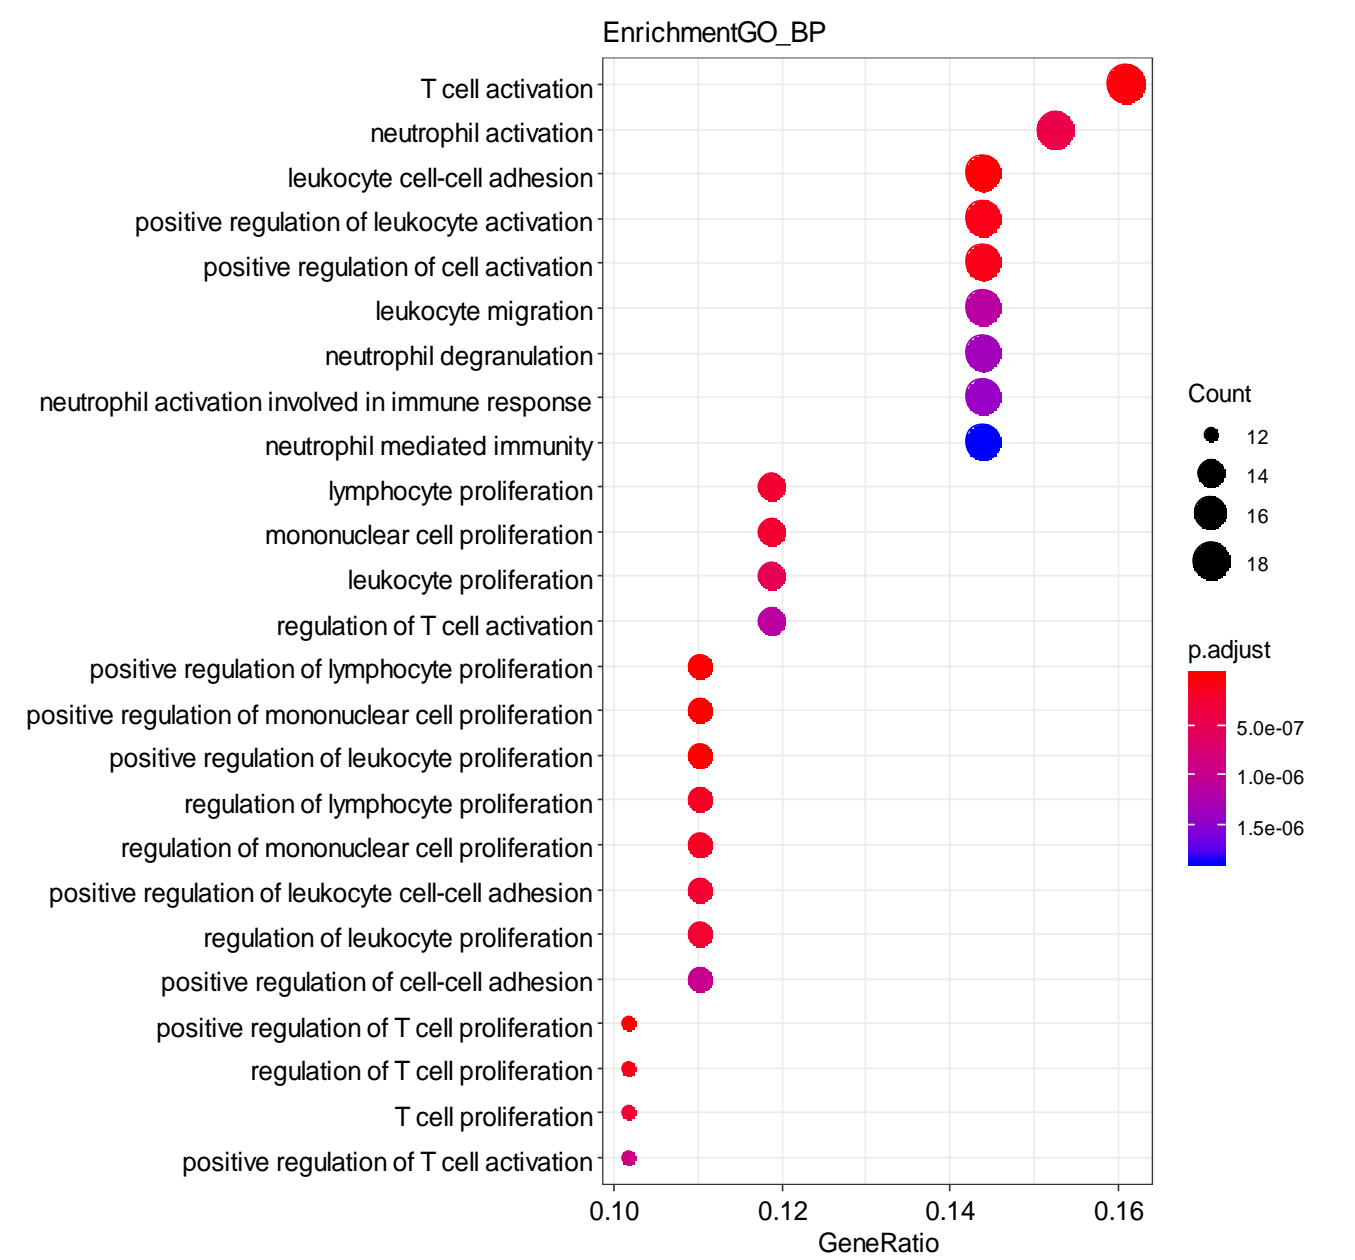

**Figure S5.** To compare the predictive accuracy of the risk score with traditional clinical factors, time-dependent ROC analysis was applied to the whole dataset. The risk score gave the highest 3-year and 5-year AUC (0.814 and 0.765, respectively), indicating that it was a better predictor of survival for LGG patients.

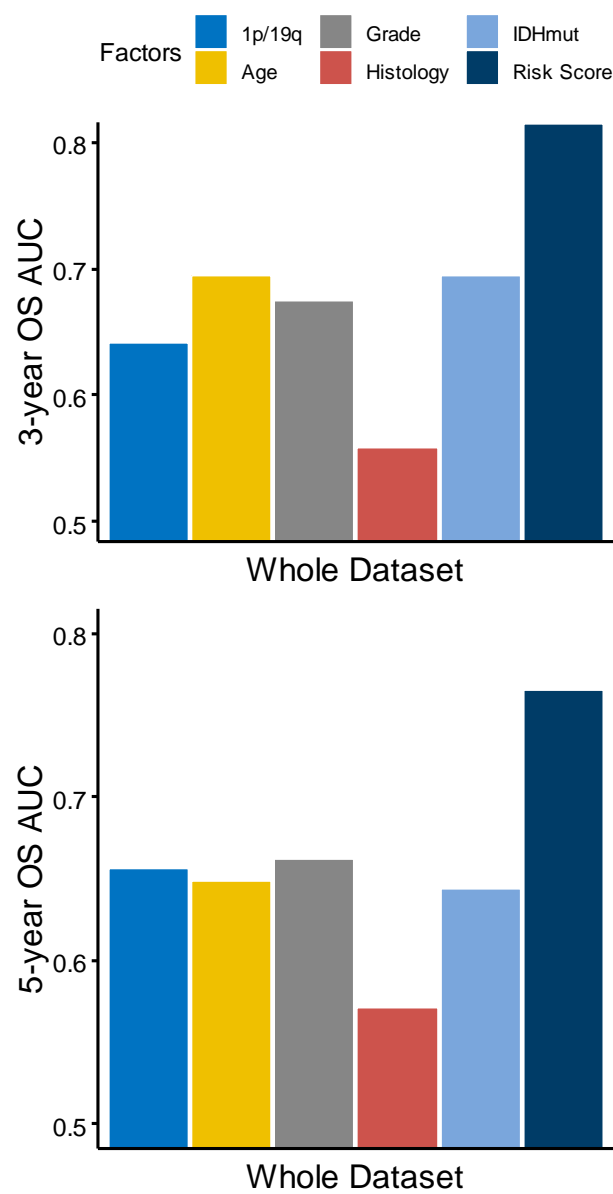

**Figure S6.** Kaplan-Meier survival analyses stratified by (A) immune-related risk score, (B) age, (C) grade, (D) IDH mutation, (E) 1p/19q status, and (F) histological type in the whole dataset. The HR value of immune-related risk was the highest, indicating that its stratification ability was superior to other prognostic factors.

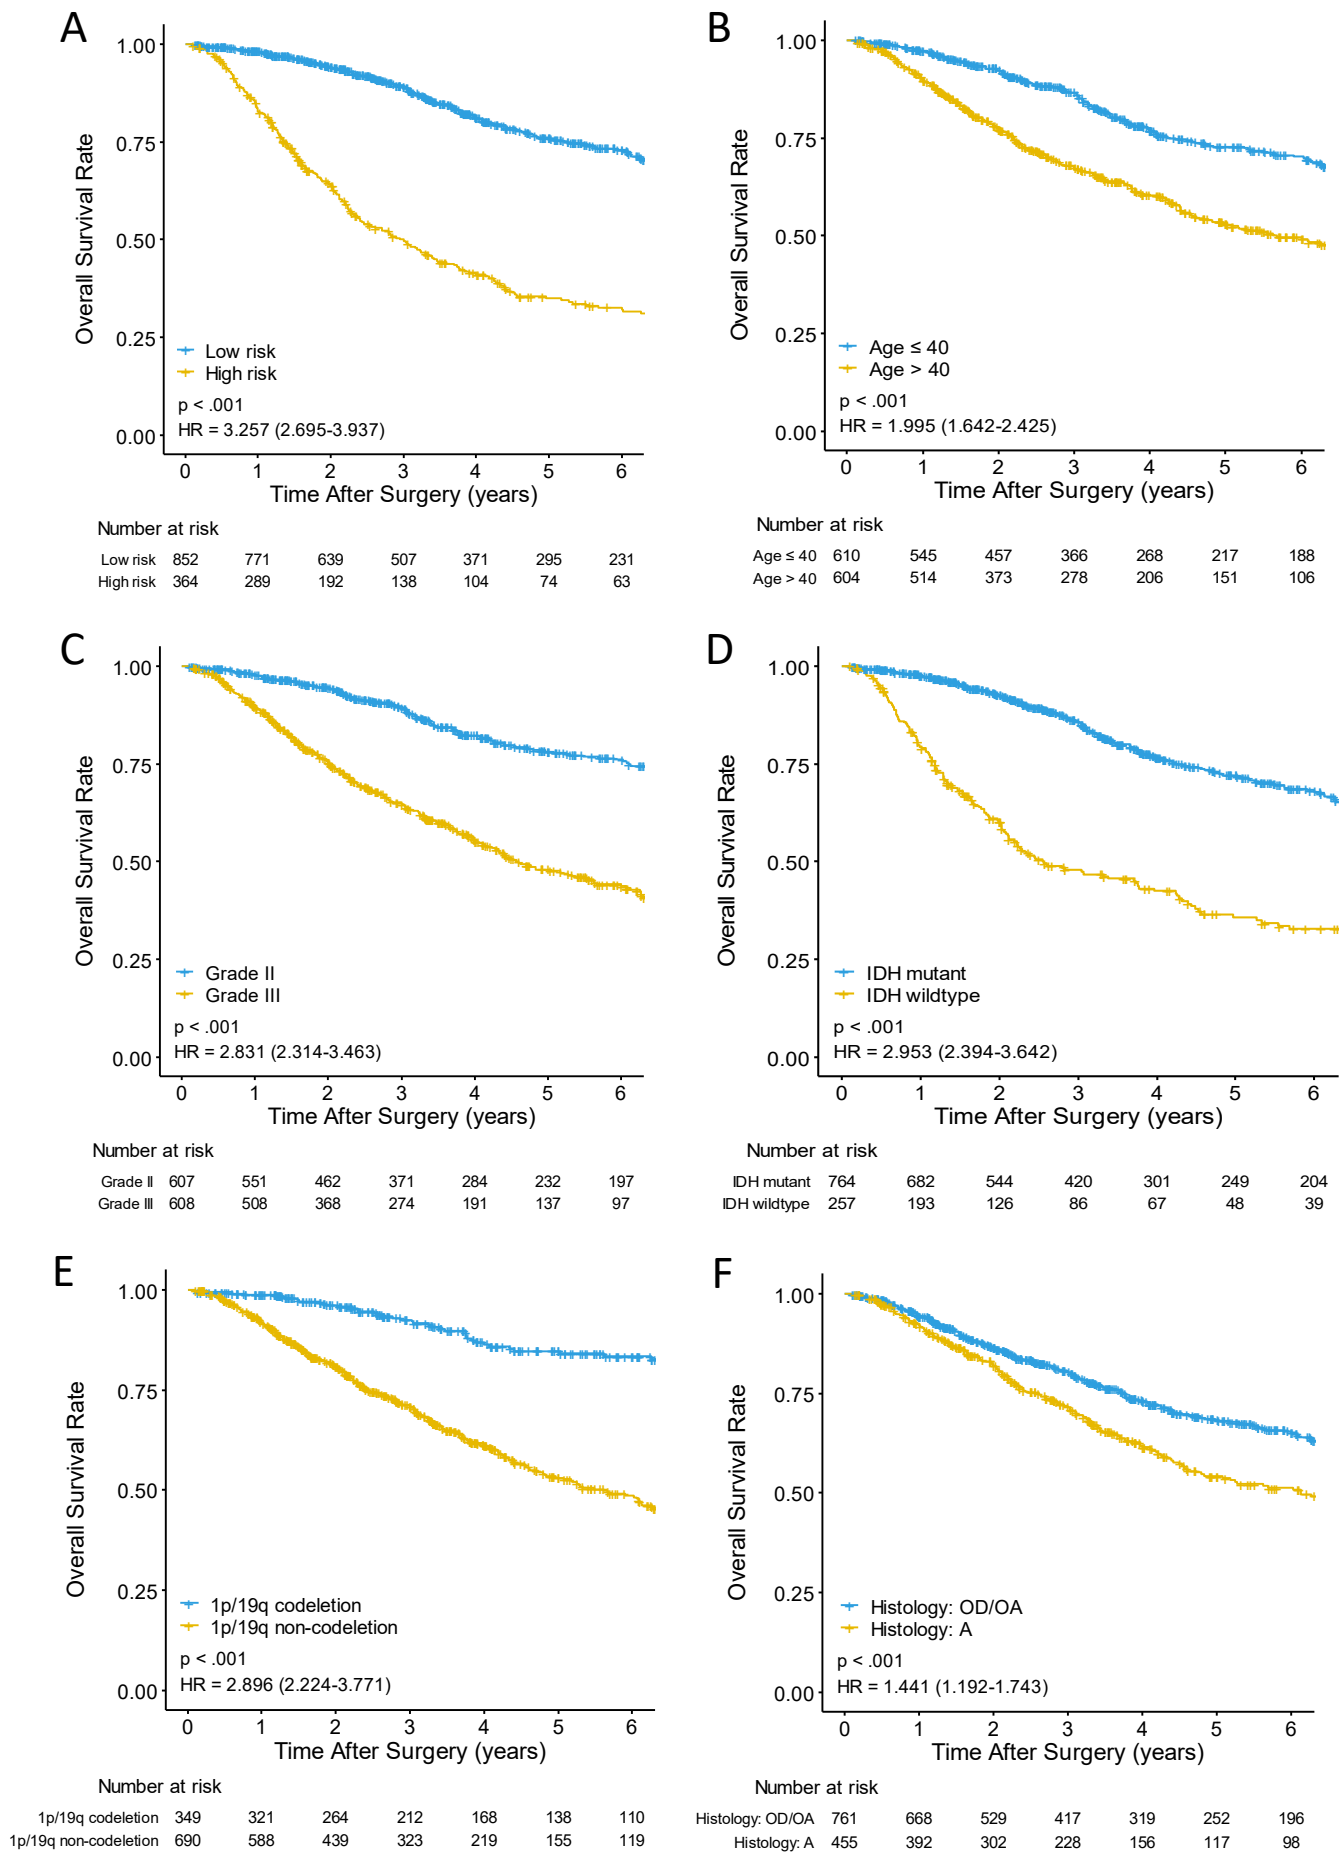



**Figure S7.** The correlation between the risk score and the expression of PD-L1 in TCGA and CGGA RNA-Seq datasets.

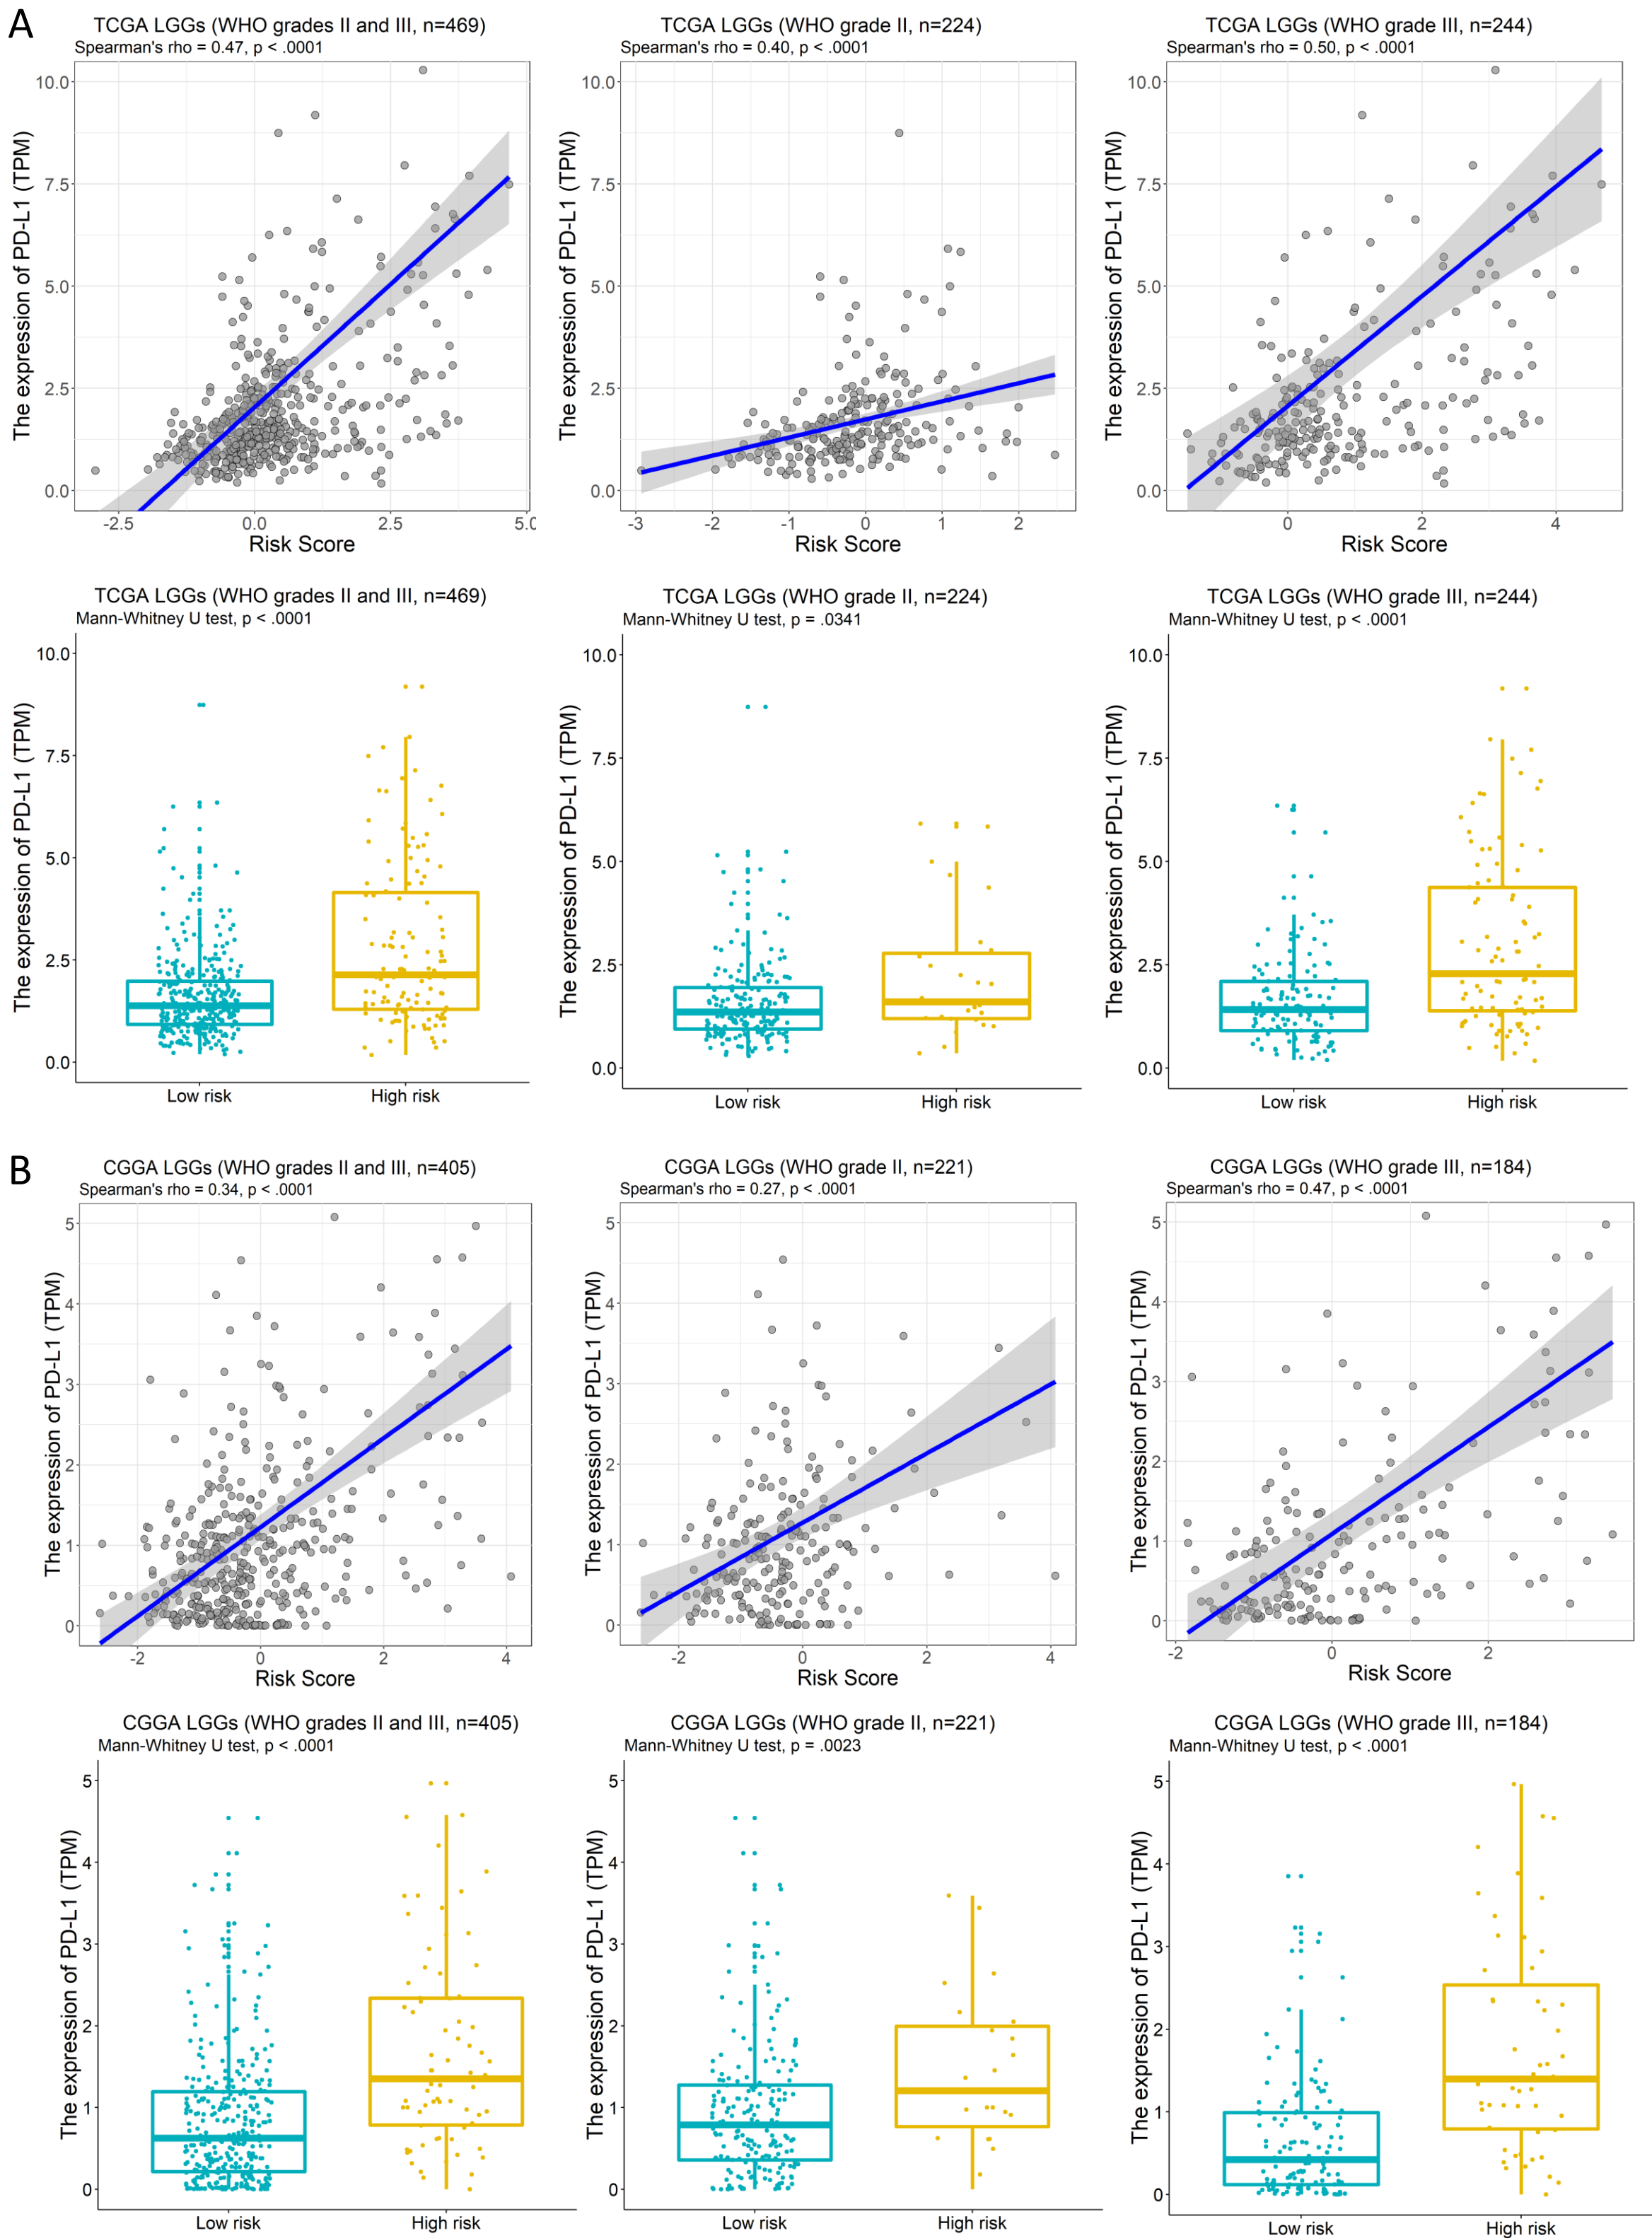

**Figure S8.** The correlation between the risk score and the expression of TGFβ1 in TCGA and CGGA RNA-Seq datasets.

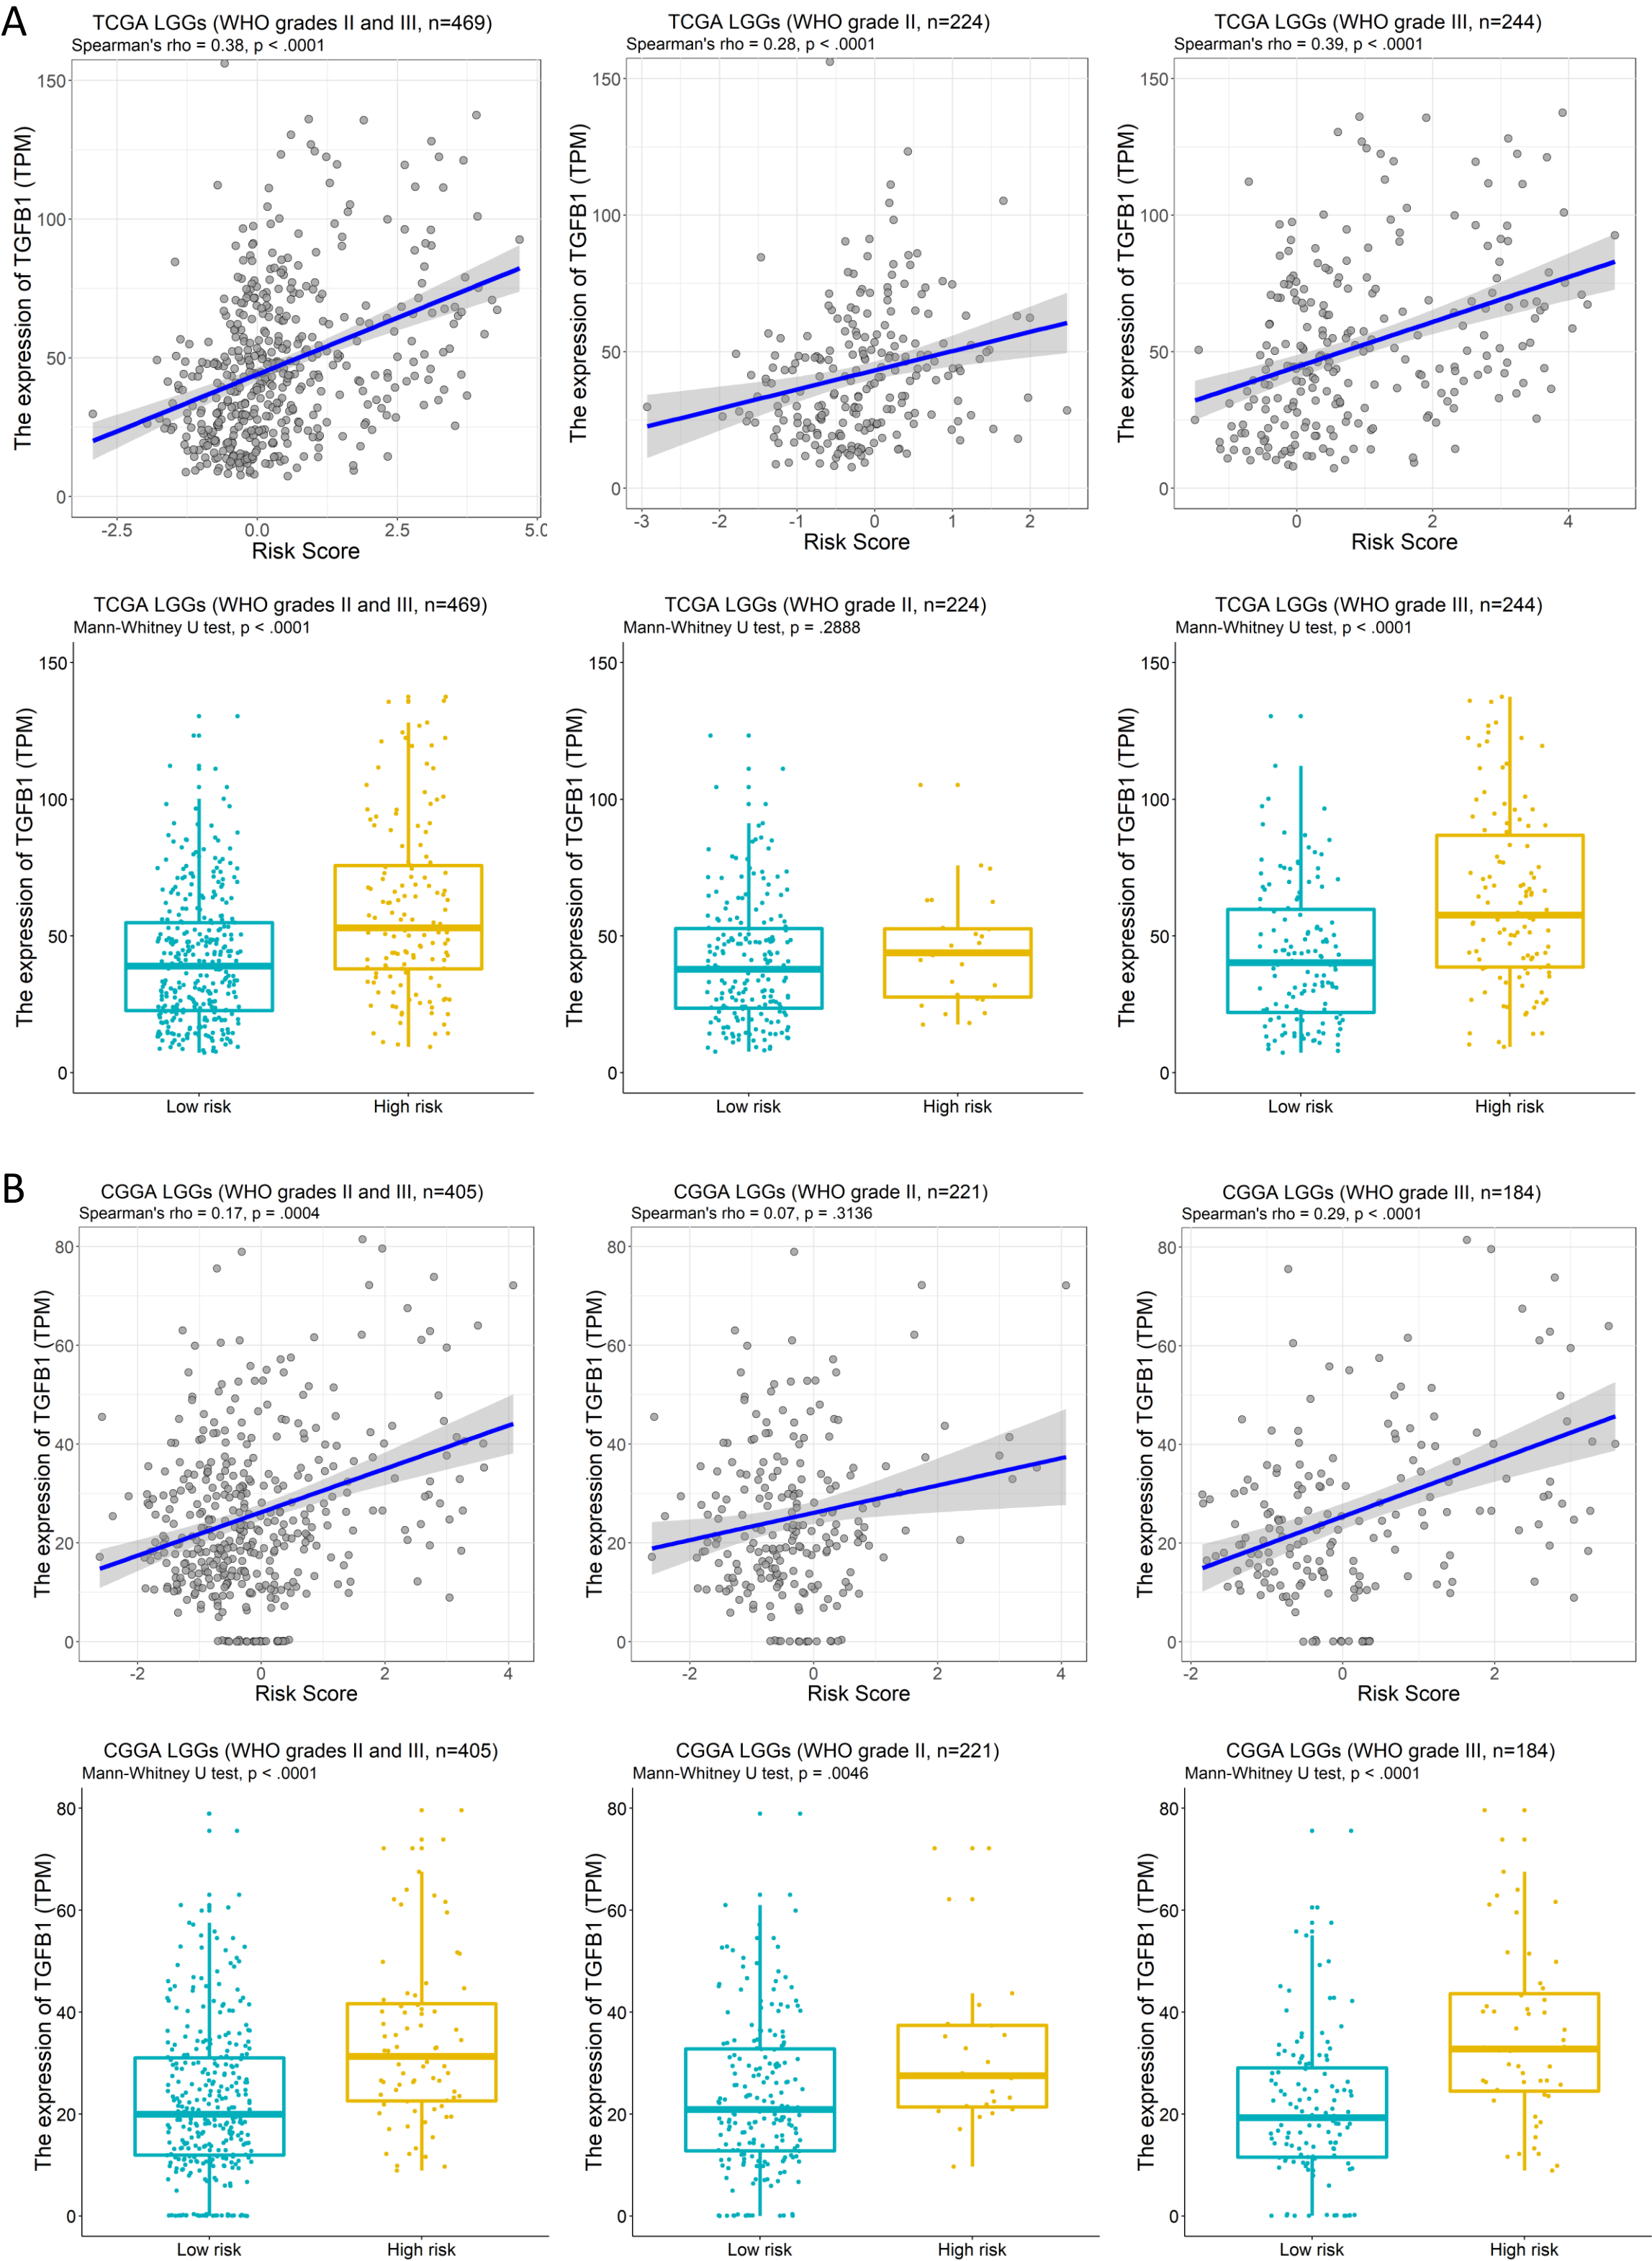

**Figure S9.** The correlation between the risk score and the expression of TGFβ2 in TCGA and CGGA RNA-Seq datasets.

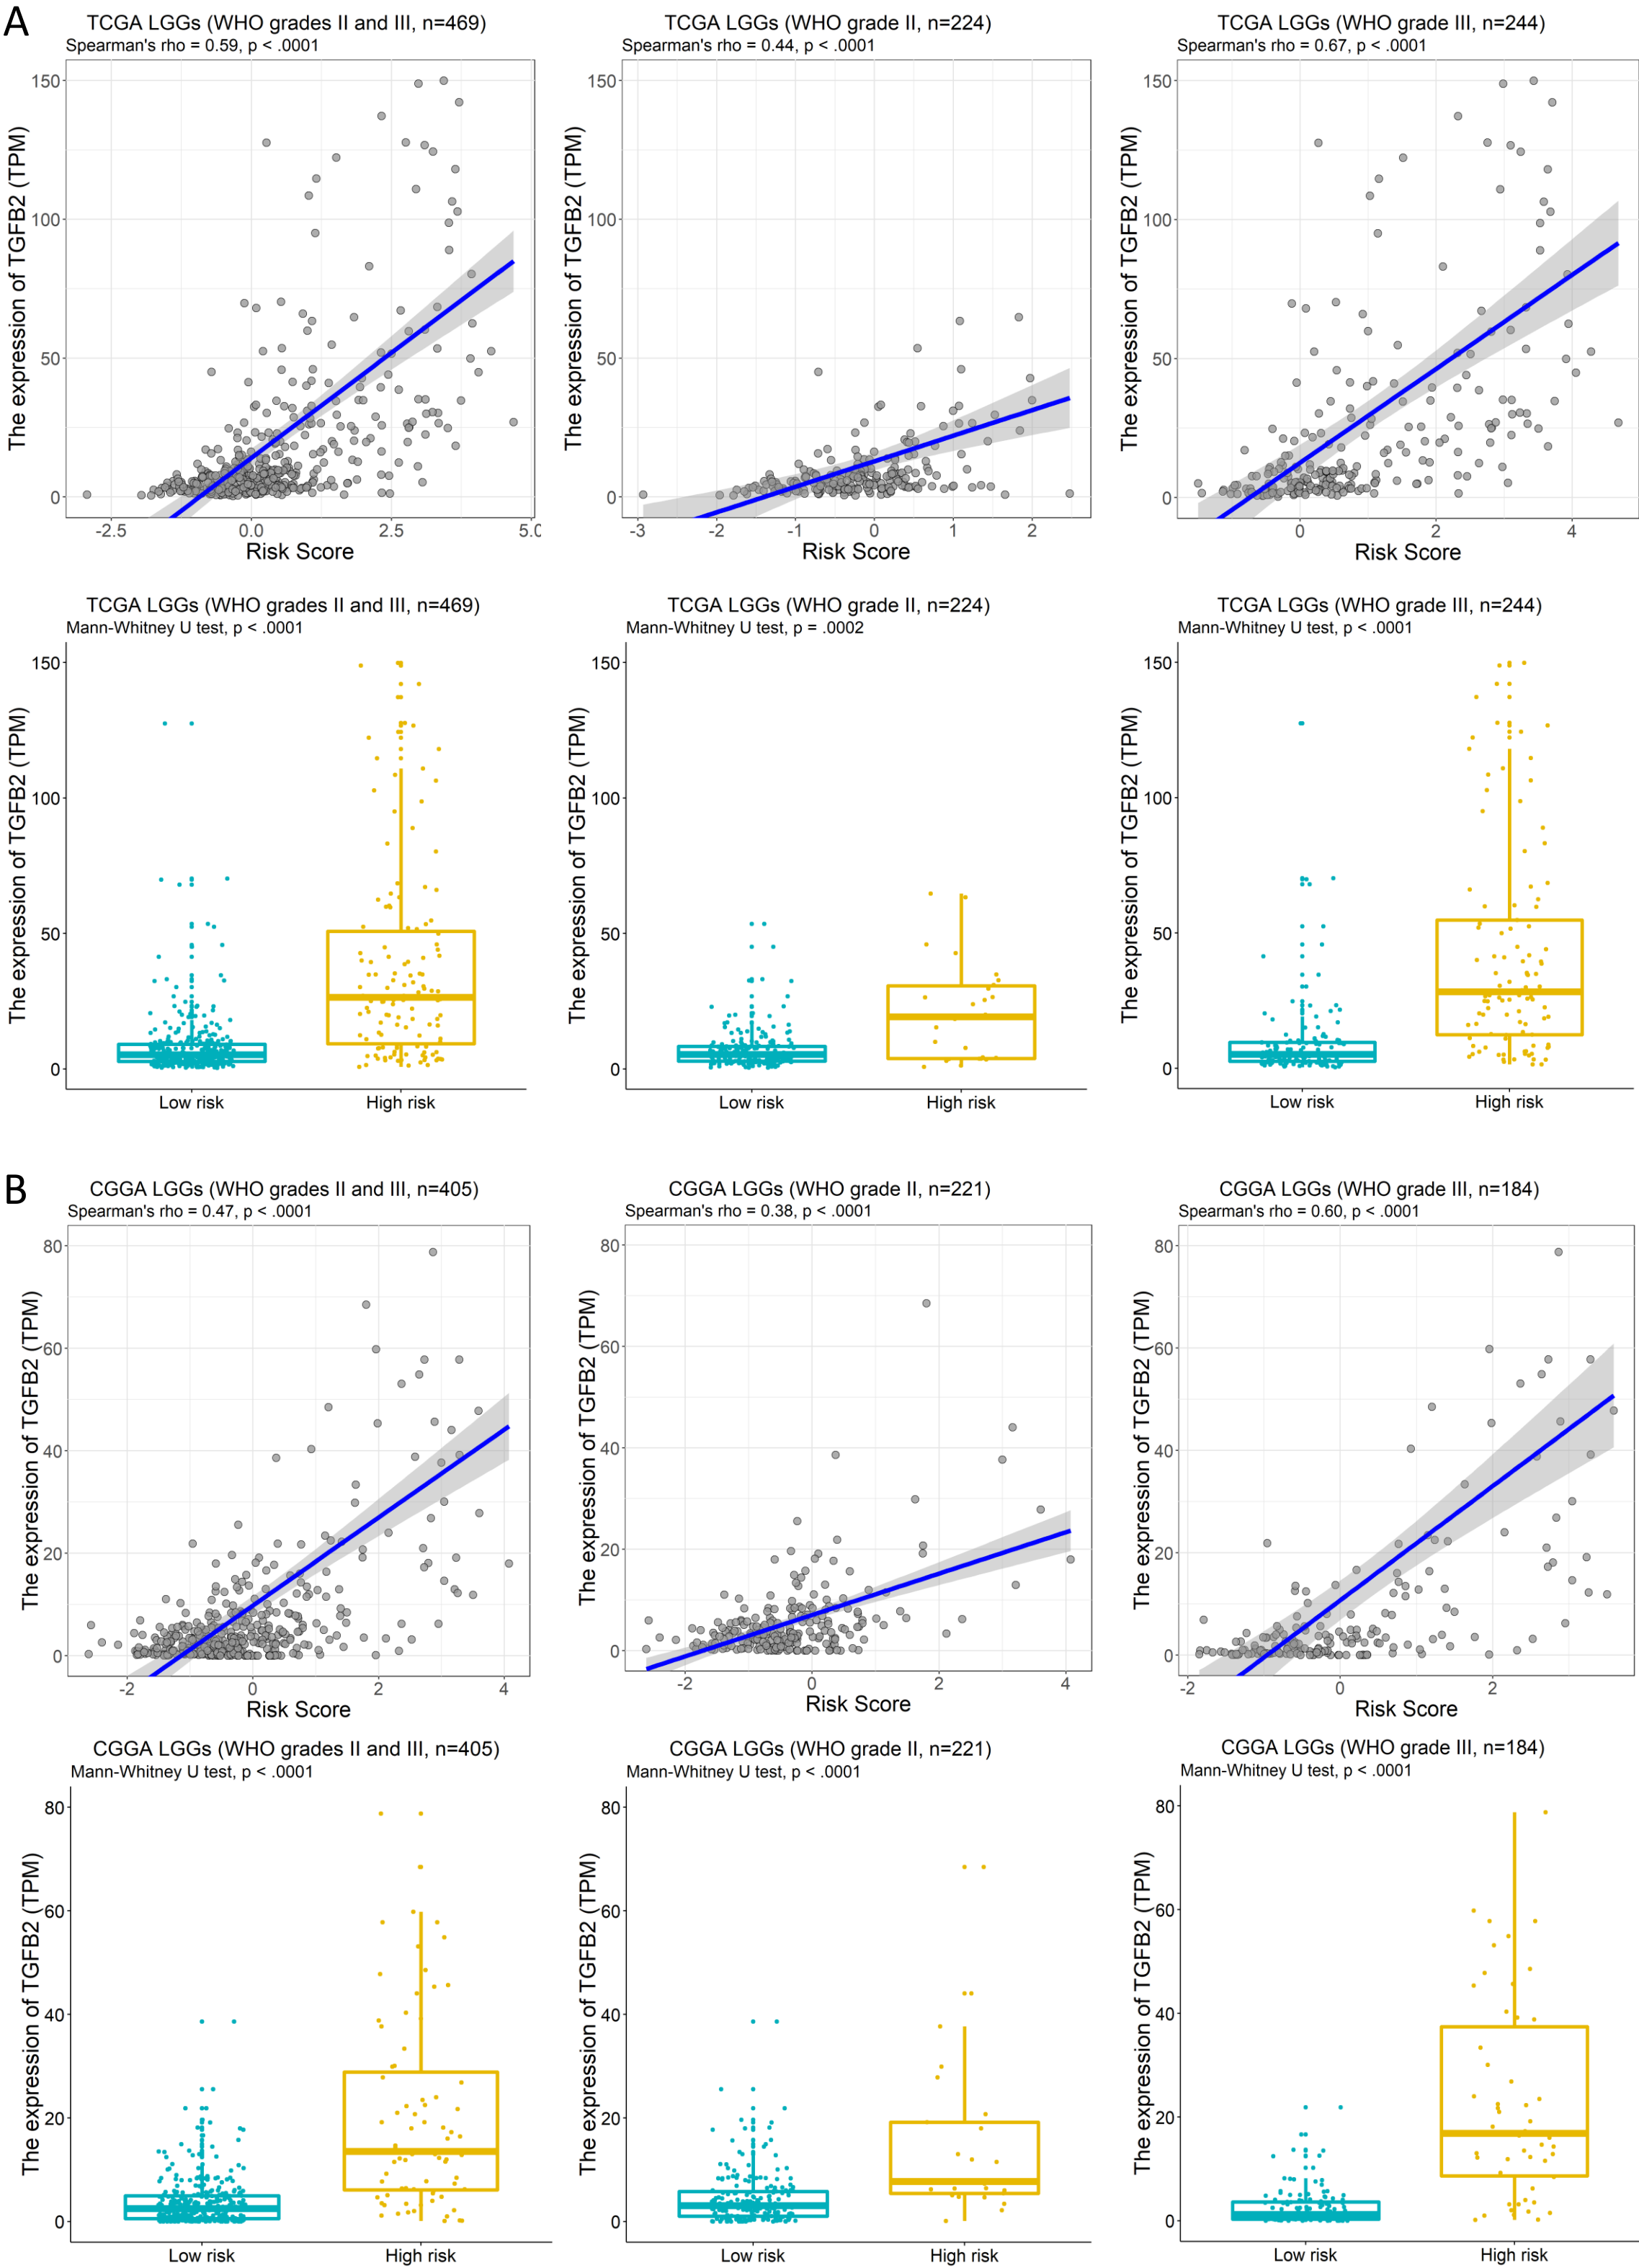

**Table S1.** Prognostic factors of LGG patients in the six datasets.

| Factors               | Training Set | Internal Validation | External Validation 1 | External Validation 2 | External Validation 3 | External Validation 4 | Whole Dataset | <i>P</i> * |
|-----------------------|--------------|---------------------|-----------------------|-----------------------|-----------------------|-----------------------|---------------|------------|
| Total No. of patients | 329          | 140                 | 405                   | 118                   | 88                    | 136                   | 1216          | NA         |
| Age                   |              |                     |                       |                       |                       |                       |               | 0.120      |
| >40 : ≤40             | 171 : 158    | 69 : 71             | 191 : 213             | 49 : 68               | 53 : 35               | 71 : 65               | 604 : 610     |            |
| Sex                   |              |                     |                       |                       |                       |                       |               | 0.319      |
| Male : Female         | 181 : 148    | 75 : 65             | 236 : 169             | 71 : 47               | 58 : 30               | NA                    | 621 : 459     |            |
| Grade                 |              |                     |                       |                       |                       |                       |               | < .001     |
| III : II              | 178 : 150    | 66 : 74             | 184 : 221             | 34 : 84               | 71 : 17               | 75 : 61               | 608 : 607     |            |
| IDH mutation          |              |                     |                       |                       |                       |                       |               | < .001     |
| Mutant : Wildtype     | 256 : 68     | 118 : 18            | 276 : 99              | 72 : 44               | 42 : 28               | NA                    | 764 : 257     |            |
| 1p/19q status         |              |                     |                       |                       |                       |                       |               | 0.003      |
| Codel : Non-codel     | 90 : 236     | 57 : 83             | 131 : 241             | NA                    | 31 : 34               | 40 : 96               | 349 : 690     |            |
| Histological type     |              |                     |                       |                       |                       |                       |               | < .001     |
| A : (OD and OA)       | 120 : 209    | 56 : 84             | 111 : 294             | 60 : 58               | 22 : 66               | 86 : 50               | 455 : 761     |            |
| Chemotherapy          |              |                     |                       |                       |                       |                       |               | < .001     |
| Yes : No              | 198 : 131    | 74 : 66             | 233 : 158             | 44 : 62               | 15 : 56               | NA                    | 564 : 473     |            |
| Radiotherapy          |              |                     |                       |                       |                       |                       |               | < .001     |
| Yes : No              | 227 : 61     | 87 : 31             | 328 : 67              | 101 : 13              | 68 : 0                | NA                    | 811 : 172     |            |
| Risk score            |              |                     |                       |                       |                       |                       |               | < .001     |
| High-risk : Low-risk  | 107 : 222    | 30 : 110            | 81 : 324              | 79 : 39               | 26 : 62               | 41 : 95               | 364 : 852     |            |

Abbreviations: NA, not available; A, astrocytoma; OD, oligodendroglioma; OA, oligoastrocytoma.

\* Pearson's chi-squared test was applied to assess the statistically significant differences in the clinical characteristics of the training and validation sets.



**Table S2.** Multivariate Cox analysis of OS in the whole dataset.

| Factors                                                                     | HR (95% CI)         | <i>P</i> |
|-----------------------------------------------------------------------------|---------------------|----------|
| Age (per 1 year increase)                                                   | 1.03 (1.02 to 1.04) | < .001   |
| Grade (III/II)                                                              | 2.10 (1.56 to 2.84) | < .001   |
| IDH mutation (mutant/wildtype)                                              | 0.88 (0.63 to 1.24) | .472     |
| 1p/19q status (code1/non-code1)                                             | 0.58 (0.40 to 0.84) | .004     |
| Histological type (A/(OD&OA))                                               | 1.18 (0.90 to 1.54) | .233     |
| Chemotherapy (yes/no)                                                       | 1.10 (0.81 to 1.48) | .547     |
| Radiotherapy (yes/no)                                                       | 0.80 (0.50 to 1.27) | .333     |
| Risk score (per 1 score increase)                                           | 1.65 (1.46 to 1.86) | < .001   |
| Abbreviations: A, astrocytoma; OD, oligodendroglioma; OA, oligoastrocytoma. |                     |          |

**Table S3.** Univariate Cox survival analysis of the 28 immune cell subpopulations based on ssGSEA scores in the TCGA dataset.

| Immune Cell Subpopulations     | HR*      | 95% CI               | P Value |
|--------------------------------|----------|----------------------|---------|
| Activated.B.cell               | 4.90E-06 | (4.3e-08 to 0.00055) | < .001  |
| Activated.CD4.T.cell           | 7.3      | (0.49 to 110)        | .150    |
| Activated.CD8T.cell            | 20       | (0.14 to 2700)       | .230    |
| Activated.dendritic.cell       | 330000   | (740 to 1.5e+08)     | < .001  |
| CD56bright.natural.killer.cell | 2.30E-07 | (1.3e-09 to 4.1e-05) | < .001  |
| CD56dim.natural.killer.cell    | 0.0063   | (0.00028 to 0.14)    | .002    |
| Central.memory.CD4.T.cell      | 6.00E+05 | (260 to 1.4e+09)     | < .001  |
| Central.memory.CD8.T.cell      | 400      | (0.63 to 260000)     | .069    |
| Effector.memeory.CD4.T.cell    | 0.00017  | (6e-06 to 0.0045)    | < .001  |
| Effector.memeory.CD8.T.cell    | 120      | (1.5 to 10000)       | .033    |
| Eosinophil                     | 4.80E-05 | (1.6e-06 to 0.0015)  | < .001  |
| Gamma.delta.T.cell             | 8600     | (45 to 1600000)      | < .001  |
| Immature.B.cell                | 50       | (0.93 to 2800)       | .055    |
| Immature.dendritic.cell        | 0.011    | (5.6e-07 to 230)     | .380    |
| Macrophage                     | 0.0087   | (0.00011 to 0.68)    | .033    |
| Mast.cell                      | 27       | (1.9 to 390)         | .015    |
| MDSC                           | 24       | (4.4 to 130)         | < .001  |
| Memory.B.cell                  | 4.2      | (0.1 to 170)         | .450    |
| Monocyte                       | 6.80E-08 | (2.1e-10 to 2.3e-05) | < .001  |
| Natural.killer.cell            | 7.20E+07 | (36000 to 1.5e+11)   | < .001  |
| Natural.killer.T.cell          | 3.80E+09 | (1.5e+07 to 9.9e+11) | < .001  |
| Neutrophil                     | 0.0056   | (0.00011 to 0.29)    | .010    |
| Plasmacytoid.dendritic.cell    | 0.057    | (8.7e-05 to 37)      | .380    |
| Regulatory.T.cell              | 0.0029   | (8e-05 to 0.11)      | .002    |
| T.follicular.helper.cell       | 8.00E-04 | (3.8e-07 to 1.7)     | .067    |
| Type.1.T.helper.cell           | 3000     | (5.2 to 1800000)     | .014    |
| Type.17.T.helper.cell          | 2.90E-06 | (3.6e-08 to 0.00024) | < .001  |
| Type.2.T.helper.cell           | 0.36     | (0.011 to 12)        | .560    |

\* Per 1 ssGSEA score increase.

**Table S4.** Characteristics of the 469 LGG patients from TCGA, according to immune infiltration type.

| Characteristic        | Immune Infiltration |      |        |      | <i>P</i> * | Whole Dataset |       |
|-----------------------|---------------------|------|--------|------|------------|---------------|-------|
|                       | Type A              |      | Type B |      |            | No.           | %     |
|                       | No.                 | %    | No.    | %    |            |               |       |
| Total No. of patients | 253                 | 53.9 | 216    | 46.1 | NA         | 469           | 100.0 |
| Age, years            |                     |      |        |      | .786       |               |       |
| >40                   | 128                 | 50.6 | 112    | 51.9 |            | 240           | 51.2  |
| ≤40                   | 125                 | 49.4 | 104    | 48.1 |            | 229           | 48.8  |
| Sex                   |                     |      |        |      | .257       |               |       |
| Female                | 121                 | 47.8 | 92     | 42.6 |            | 213           | 45.4  |
| Male                  | 132                 | 52.2 | 124    | 57.4 |            | 256           | 54.6  |
| Grade                 |                     |      |        |      | .010       |               |       |
| II                    | 135                 | 53.4 | 89     | 41.4 |            | 224           | 47.9  |
| III                   | 118                 | 46.6 | 126    | 58.6 |            | 244           | 52.1  |
| IDH mutation          |                     |      |        |      | .001       |               |       |
| Mutant                | 216                 | 86.7 | 158    | 74.9 |            | 374           | 81.3  |
| Wildtype              | 33                  | 13.3 | 53     | 25.1 |            | 86            | 18.7  |
| 1p/19q status         |                     |      |        |      | < .001     |               |       |
| Codeletion            | 122                 | 48.6 | 25     | 11.6 |            | 147           | 31.5  |
| Non-codeletion        | 129                 | 51.4 | 190    | 88.4 |            | 319           | 68.5  |
| Histological type     |                     |      |        |      | < .001     |               |       |
| Astrocytoma           | 61                  | 24.1 | 115    | 53.2 |            | 176           | 37.5  |
| Oligoastrocytoma      | 62                  | 24.5 | 59     | 27.3 |            | 121           | 25.8  |
| Oligodendroglioma     | 130                 | 51.4 | 42     | 19.4 |            | 172           | 36.7  |

Abbreviations: NA, not applicable.

\* Pearson's chi-squared test.

**Table S5.** The associations between clinical variables, genetic variables, and immunological phenotype.

|                         | correlation coefficient | <i>P</i> |
|-------------------------|-------------------------|----------|
| Age                     | -0.012                  | .786     |
| Sex                     | -0.052                  | .257     |
| Grade                   | -0.119                  | .010     |
| IDH mutation            | 0.152                   | .001     |
| 1p19q codeletion        | 0.397                   | < .001   |
| Histological type       | 0.33                    | < .001   |
| Immunological phenotype | 1                       | < .001   |



**Table S6.** List of the 120 survival-related immune metagenes common to both TCGA and CGGA RNA-Seq datasets.

| Metagene | Cell Type                   | Immunity |
|----------|-----------------------------|----------|
| ADAM28   | Activated B cell            | Adaptive |
| CD180    | Activated B cell            | Adaptive |
| BLK      | Activated B cell            | Adaptive |
| CLECL1   | Activated B cell            | Adaptive |
| BRIP1    | Activated CD4 T cell        | Adaptive |
| CCL5     | Activated CD4 T cell        | Adaptive |
| CCNB1    | Activated CD4 T cell        | Adaptive |
| ESCO2    | Activated CD4 T cell        | Adaptive |
| EXO1     | Activated CD4 T cell        | Adaptive |
| KIF11    | Activated CD4 T cell        | Adaptive |
| KNTC1    | Activated CD4 T cell        | Adaptive |
| NUF2     | Activated CD4 T cell        | Adaptive |
| PRC1     | Activated CD4 T cell        | Adaptive |
| RTKN2    | Activated CD4 T cell        | Adaptive |
| SAMSN1   | Activated CD4 T cell        | Adaptive |
| SELL     | Activated CD4 T cell        | Adaptive |
| CD37     | Activated CD8T cell         | Adaptive |
| CD3D     | Activated CD8T cell         | Adaptive |
| CD8A     | Activated CD8T cell         | Adaptive |
| GZMK     | Activated CD8T cell         | Adaptive |
| MPZL1    | Activated CD8T cell         | Adaptive |
| ZAP70    | Activated CD8T cell         | Adaptive |
| COL4A1   | Central memory CD4 T cell   | Adaptive |
| ITGB2    | Central memory CD4 T cell   | Adaptive |
| VIM      | Central memory CD4 T cell   | Adaptive |
| FCER1G   | Central memory CD8 T cell   | Adaptive |
| SIGLEC1  | Central memory CD8 T cell   | Adaptive |
| EZH2     | Effector memeory CD4 T cell | Adaptive |
| PTGS1    | Effector memeory CD4 T cell | Adaptive |
| TFEC     | Effector memeory CD4 T cell | Adaptive |
| C3AR1    | Effector memeory CD8 T cell | Adaptive |
| CCR5     | Effector memeory CD8 T cell | Adaptive |
| FLT3LG   | Effector memeory CD8 T cell | Adaptive |
| HLA-DMB  | Effector memeory CD8 T cell | Adaptive |
| HLA-DPA1 | Effector memeory CD8 T cell | Adaptive |
| HLA-DPB1 | Effector memeory CD8 T cell | Adaptive |
| IFI16    | Effector memeory CD8 T cell | Adaptive |
| ACP5     | Gamma delta T cell          | Adaptive |
| BTN3A2   | Gamma delta T cell          | Adaptive |
| CD33     | Gamma delta T cell          | Adaptive |
| LMNB1    | Gamma delta T cell          | Adaptive |
| FABP5    | Gamma delta T cell          | Adaptive |
| FADD     | Gamma delta T cell          | Adaptive |
| CYBB     | Immature B cell             | Adaptive |
| HLA-DQA1 | Immature B cell             | Adaptive |
| MS4A6A   | Regulatory T cell           | Adaptive |
| CD84     | T follicular helper cell    | Adaptive |
| CEBPA    | T follicular helper cell    | Adaptive |
| CTSS     | T follicular helper cell    | Adaptive |
| PDCD1LG2 | T follicular helper cell    | Adaptive |
| SIGLEC7  | T follicular helper cell    | Adaptive |
| SIGLEC9  | T follicular helper cell    | Adaptive |
| CD48     | Type 1 T helper cell        | Adaptive |
| CD53     | Type 1 T helper cell        | Adaptive |
| CD68     | Type 1 T helper cell        | Adaptive |
| COL5A3   | Type 1 T helper cell        | Adaptive |
| EMP1     | Type 1 T helper cell        | Adaptive |
| SIT1     | Type 1 T helper cell        | Adaptive |
| SIGLEC10 | Type 1 T helper cell        | Adaptive |
| SKAP1    | Type 1 T helper cell        | Adaptive |

|          |                                |          |
|----------|--------------------------------|----------|
| P2RX5    | Type 1 T helper cell           | Adaptive |
| TLR8     | Type 1 T helper cell           | Adaptive |
| TRAF1    | Type 1 T helper cell           | Adaptive |
| DUSP14   | Type 1 T helper cell           | Adaptive |
| ABCA1    | Type 17 T helper cell          | Adaptive |
| ANK1     | Type 17 T helper cell          | Adaptive |
| ANKRD22  | Type 17 T helper cell          | Adaptive |
| IFT80    | Type 17 T helper cell          | Adaptive |
| CSRP2    | Type 2 T helper cell           | Adaptive |
| LAMP3    | Type 2 T helper cell           | Adaptive |
| TMPRSS3  | Type 2 T helper cell           | Adaptive |
| BIRC5    | Type 2 T helper cell           | Adaptive |
| CDC25C   | Type 2 T helper cell           | Adaptive |
| CENPF    | Type 2 T helper cell           | Adaptive |
| C1QC     | Activated dendritic cell       | Innate   |
| C1QB     | Activated dendritic cell       | Innate   |
| TREM1    | Activated dendritic cell       | Innate   |
| SLA      | Activated dendritic cell       | Innate   |
| HDC      | CD56bright natural killer cell | Innate   |
| HEY1     | CD56bright natural killer cell | Innate   |
| HOXA1    | CD56bright natural killer cell | Innate   |
| C1QA     | CD56bright natural killer cell | Innate   |
| C1QB     | CD56bright natural killer cell | Innate   |
| AKR7A3   | CD56dim natural killer cell    | Innate   |
| GRIN1    | CD56dim natural killer cell    | Innate   |
| GPR65    | Eosinophil                     | Innate   |
| PLAU     | Immature dendritic cell        | Innate   |
| FPR1     | Macrophage                     | Innate   |
| GPR27    | Macrophage                     | Innate   |
| BASP1    | Macrophage                     | Innate   |
| IGSF6    | Macrophage                     | Innate   |
| CD4      | Macrophage                     | Innate   |
| NME8     | Macrophage                     | Innate   |
| CRYBB1   | Macrophage                     | Innate   |
| ADAMTS3  | Mast cell                      | Innate   |
| ARHGAP15 | Mast cell                      | Innate   |
| HSPA6    | Mast cell                      | Innate   |
| SIGLEC8  | Mast cell                      | Innate   |
| CCR2     | MDSC                           | Innate   |
| CD14     | MDSC                           | Innate   |
| CD2      | MDSC                           | Innate   |
| CD86     | MDSC                           | Innate   |
| FERMT3   | MDSC                           | Innate   |
| ITGAL    | MDSC                           | Innate   |
| IKZF1    | Monocyte                       | Innate   |
| CSF2RA   | Natural killer cell            | Innate   |
| DLL4     | Natural killer cell            | Innate   |
| FN1      | Natural killer cell            | Innate   |
| GBP3     | Natural killer cell            | Innate   |
| IGFBP5   | Natural killer cell            | Innate   |
| CD101    | Natural killer T cell          | Innate   |
| SLC7A7   | Natural killer T cell          | Innate   |
| SPP1     | Natural killer T cell          | Innate   |
| TREM2    | Natural killer T cell          | Innate   |
| VCAM1    | Natural killer T cell          | Innate   |
| ADGRE1   | Natural killer T cell          | Innate   |
| MMP25    | Neutrophil                     | Innate   |
| CBX6     | Plasmacytoid dendritic cell    | Innate   |
| PDIA4    | Plasmacytoid dendritic cell    | Innate   |
| PROK2    | Plasmacytoid dendritic cell    | Innate   |
| CD300LF  | Plasmacytoid dendritic cell    | Innate   |

**Table S7.** Multivariate Cox analysis of OS in high- and low-risk groups of the whole dataset.

| Factors                         | High-risk group     |          | Low-risk group      |          |
|---------------------------------|---------------------|----------|---------------------|----------|
|                                 | HR (95% CI)         | <i>P</i> | HR (95% CI)         | <i>P</i> |
| Age (per 1 year increase)       | 1.04 (1.02 to 1.05) | < .001   | 1.02 (1.00 to 1.04) | .031     |
| Grade (III/II)                  | 2.43 (1.48 to 3.99) | < .001   | 2.17 (1.48 to 3.19) | < .001   |
| IDH mutation (mutant/wildtype)  | 0.50 (0.32 to 0.76) | .001     | 1.07 (0.56 to 2.07) | .835     |
| 1p/19q status (code1/non-code1) | 0.73 (0.34 to 1.56) | .421     | 0.43 (0.28 to 0.68) | < .001   |
| Histological type (A/(OD&OA))   | 1.16 (0.81 to 1.64) | .408     | 1.55 (1.02 to 2.36) | .040     |
| Chemotherapy (yes/no)           | 1.02 (0.66 to 1.57) | .929     | 1.11 (0.75 to 1.62) | .608     |
| Radiotherapy (yes/no)           | 0.44 (0.21 to 0.91) | .027     | 1.05 (0.57 to 1.92) | .882     |

Abbreviations: A, astrocytoma; OD, oligodendroglioma; OA, oligoastrocytoma.
